# Supplementary material for: A Novel Approach to Left Ventricular Filling Pressure Assessment: The Role of Hemodynamic Forces Analysis
Source: PubMed Central journal article supplement (PMC8455914; doi:10.3389/fcvm.2021.704909), 2021-09-08
Supplement: Data_Sheet_1.pdf [file Data_Sheet_1.pdf]

## **SUPPLEMENTARY MATERIAL**

### Bootstrapping Validation

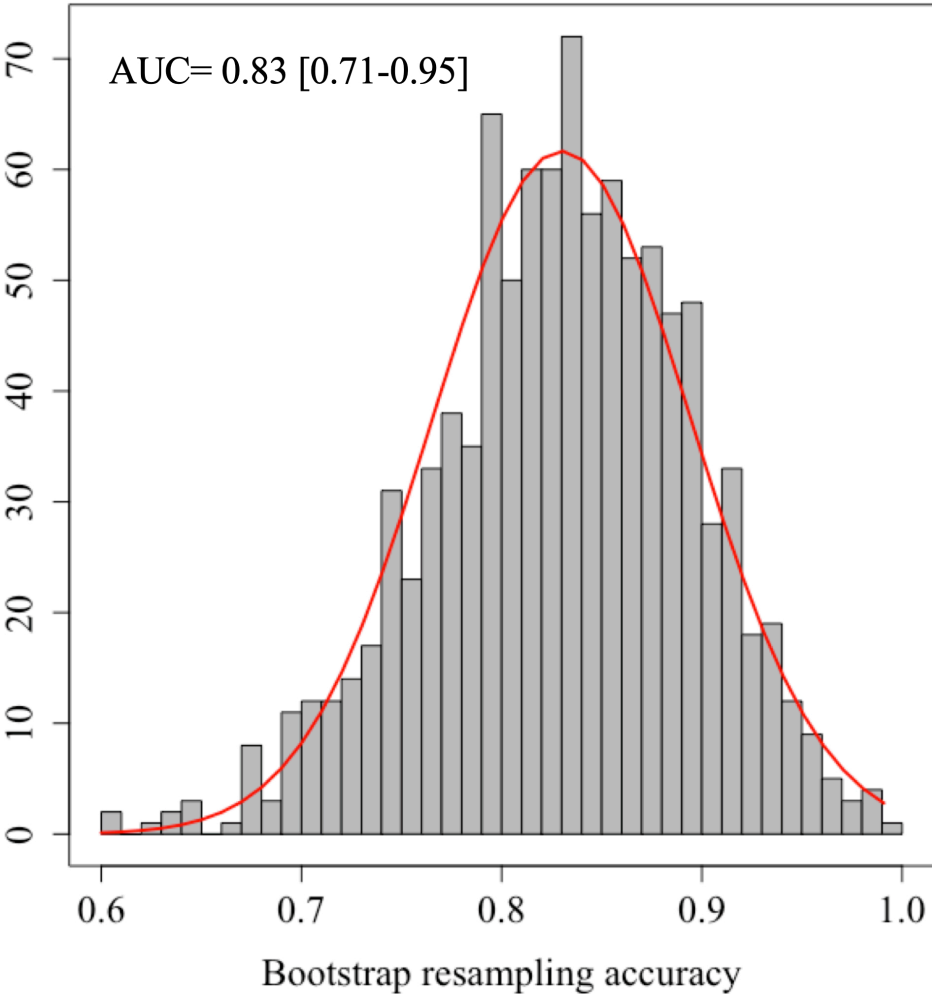

Distribution of bootstrapped AUC.

**Supplementary Figure 2 – Calibration Histogram**

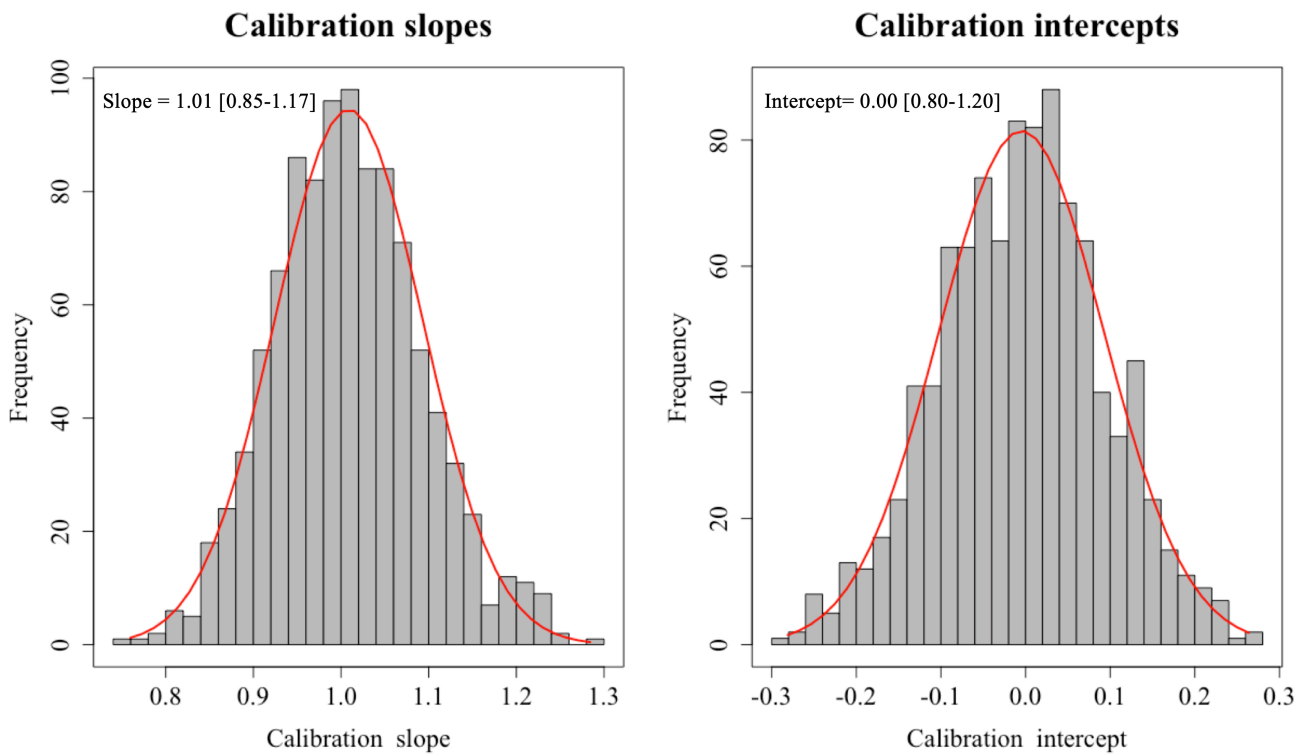

*Distribution of bootstrapped slopes and intercept of calibration curve. The optimal is slope=1 and intercept=0.*

**Supplementary Table 1 – Comparison between included and excluded patients according to the presence of HDFs analysis.**

|                                                  | HDFs available    |                  | p. value         |
|--------------------------------------------------|-------------------|------------------|------------------|
|                                                  | No<br>N=81        | Yes<br>N=67      |                  |
| <b>Demographic characteristics</b>               |                   |                  |                  |
| Age (years)                                      | 58.27±14.19       | 62.2±13.1        | 0.084            |
| Sex (Male) (n(%))                                | 46 (55.4%)        | 41 (61.2%)       | 0.585            |
| Weight (Kg)                                      | 73.8±14.8         | 71.8±14.7        | 0.417            |
| Height (cm)                                      | 167±10.4          | 166±9.17         | 0.750            |
| BMI (kg/m <sup>2</sup> )                         | 26.2 [23.0;29.6]  | 25.3 [22.8;28.5] | 0.514            |
| BSA (m <sup>2</sup> )                            | 1.82±0.21         | 1.79±0.20        | 0.442            |
| SBP (mmHg)                                       | 128±20.2          | 132±20.0         | 0.383            |
| DBP (mmHg)                                       | 73.9±13.3         | 73.5±12.3        | 0.905            |
| <b>Conventional Echocardiographic parameters</b> |                   |                  |                  |
| LVMi (g/m <sup>2</sup> )                         | 101±32.2          | 149±45.1         | <b>&lt;0.001</b> |
| RWT                                              | 0.39 [0.33;0.47]  | 0.39 [0.32;0.44] | 0.487            |
| LVH (n(%))                                       | 33 (40.7%)        | 59 (88.1%)       | <b>&lt;0.001</b> |
| LAVi (ml/m <sup>2</sup> )                        | 40.8 [29.9;53.3]  | 41.4 [33.4;55.2] | 0.621            |
| LAe (n(%))                                       | 53 (65.4%)        | 46 (68.7%)       | 0.855            |
| TmE (m/s)                                        | 0.63 [0.50;0.84]  | 0.69 [0.57;0.84] | 0.323            |
| TmE/TmA                                          | 1.00 [0.71;1.34]  | 0.99 [0.71;1.45] | 0.782            |
| LtdiE (cm/s)                                     | 7.80 [5.60;10.2]  | 8.30 [5.62;10.3] | 0.967            |
| StdiE (cm/s)                                     | 5.25 [3.77;7.00]  | 5.20 [3.82;7.20] | 0.944            |
| TmE/MtdiE                                        | 9.36 [7.13;13.8]  | 9.57 [7.77;14.0] | 0.586            |
| <b>Right Heart Catheterization</b>               |                   |                  |                  |
| mPAP (mmHg)                                      | 32.2±13.9         | 29.9±11.4        | 0.278            |
| PCWP (mmHg)                                      | 14.00 [12.0;23.0] | 14.0 [11.3;20.0] | 0.667            |
| ILFP (n(%))                                      | 40 (49.3%)        | 33 (49.3%)       | 1.000            |

Significant *p* results between ILFP and NLFP are reported by boldface. **Legend:** BMI=body mass index; BSA=body surface area; SBP=systolic blood pressure; DBP=diastolic blood pressure; LVMi=left ventricular mass indexed to body surface area; LVH=left ventricular hypertrophy; LAVi=left atrial volume indexed to body surface area; LAe=left atrial enlargement; MAP=mean pulmonary arterial pressure; PCWP=postcapillary wedge pressure; ILFP=increased left ventricular filling pressure.

**Supplementary Table 2 – Scoring system development: penalized logistic regression for variable selection.**

|                                                  | <b>beta</b> |
|--------------------------------------------------|-------------|
| <b>Demographic characteristics</b>               |             |
| Age (years)                                      | -           |
| Sex (male)                                       | -           |
| <b>Conventional Echocardiographic parameters</b> |             |
| EF (%)                                           | -0.322      |
| GLS (%)                                          | -           |
| LVMi (g/m <sup>2</sup> )                         | -           |
| LAVi (ml/m <sup>2</sup> )                        | 1.046       |
| TmE/MtdiE                                        | 0.027       |
| StdiE (cm/s)                                     | -0.173      |
| TRv (m/s)                                        | -           |
| EDVi (ml/m <sup>2</sup> )                        | -           |
| <b>Hemodynamic Forces</b>                        |             |
| DLF (%)                                          | -0.058      |

Beta coefficients are available only for variables revealed to be strong predictors of PCWP class; other ones have been shrinkaged to zero. **Legend:** LVMi=left ventricular mass indexed to body surface area; LAVi=left atrial volume indexed to body surface area; TmE/MtdiE=E wave on transmitral doppler/ mean tissue doppler E wave; StdiE=septal tissue doppler E wave; TRv=tricuspidal regurgitation velocity; DLF=diastolic longitudinal force.

**Supplementary Table 3 – Performance of the scoring system with a 2-points threshold**

| <b>Whole study population</b>                                             | <b>NLFP</b><br><i>n = 34</i> | <b>ILFP</b><br><i>n = 33</i> |                         |
|---------------------------------------------------------------------------|------------------------------|------------------------------|-------------------------|
| Scoring points ≤ 2                                                        | 29                           | 9                            | <i>NPV = 76.3%</i>      |
| Scoring points > 2                                                        | 5                            | 24                           | <i>PPV = 82.8%</i>      |
|                                                                           | <i>Specificity = 85.3%</i>   | <i>Sensibility = 72.7%</i>   | <i>Accuracy = 79.1%</i> |
| <b>“Indeterminate filling pressure” according current recommendations</b> | <b>NLFP</b><br><i>n = 18</i> | <b>ILFP</b><br><i>n = 6</i>  |                         |
| Scoring points ≤ 2                                                        | 17                           | 2                            | <i>NPV = 89.5%</i>      |
| Scoring points > 2                                                        | 1                            | 4                            | <i>PPV = 80.0%</i>      |
|                                                                           | <i>Specificity = 94.4%</i>   | <i>Sensibility = 66.7%</i>   | <i>Accuracy = 87.5%</i> |

**Legend:** ILFP=increased left ventricular filling pressure; NLFP= normal left ventricular filling pressure, NPV: negative predictive value; PPV: positive predictive value.
